# Supplementary material for: Surface Evaluation of Orthodontic Brackets Using Texture and Fractal Dimension Analysis
Source: MDPI journal article supplement (doi:10.3390/ma15062071), 2022-03-11
Supplement: s1 [file s1]

# Surface Evaluation of Orthodontic Brackets Using Texture and Fractal Dimension Analysis

Michał Sarul <sup>1,\*</sup>, Marcin Mikulewicz <sup>2</sup>, Marcin Kozakiewicz <sup>3</sup> and Kamil Jurczyszyn <sup>4</sup>

**Table S1.** *p* Value of post hoc ANOVA results (least significant difference) for comparison of FD values between series of the same type of bracket (MS—Mini Sprint II, S—Sprint II, N—Nu-Edge, O—Orthos SS).

| MS     |          |          |          |          |
|--------|----------|----------|----------|----------|
| Series | 1        | 2        | 3        | 4        |
| 1      |          | 0.224200 | 0.477304 | 0.674151 |
| 2      | 0.224200 |          | 0.061807 | 0.108316 |
| 3      | 0.477304 | 0.061807 |          | 0.769125 |
| 4      | 0.674151 | 0.108316 | 0.769125 |          |
| S      |          |          |          |          |
| Series | 1        | 2        | 3        | 4        |
| 1      |          | 0.000141 | 0.958038 | 0.003099 |
| 2      | 0.000141 |          | 0.000160 | 0.199682 |
| 3      | 0.958038 | 0.000160 |          | 0.003503 |
| 4      | 0.003099 | 0.199682 | 0.003503 |          |
| N      |          |          |          |          |
| Series | 1        | 2        | 3        | 4        |
| 1      |          | 0.849285 | 0.332815 | 0.865850 |
| 2      | 0.849285 |          | 0.433121 | 0.983147 |
| 3      | 0.332815 | 0.433121 |          | 0.421119 |
| 4      | 0.865850 | 0.983147 | 0.421119 |          |
| O      |          |          |          |          |
| Series | 1        | 2        | 3        | 4        |
| 1      |          | 0.234195 | 0.122801 | 0.029355 |
| 2      | 0.234195 |          | 0.704622 | 0.275985 |
| 3      | 0.122801 | 0.704622 |          | 0.470611 |
| 4      | 0.029355 | 0.275985 | 0.470611 |          |

**Table S2.** *p* Value of post hoc ANOVA results (least significant difference) for comparison of FD values between type of brackets (MS—Mini Sprint II, S—Sprint II, N—Nu-Edge, O—Orthos SS).

|    | MS       | S        | N        | O        |
|----|----------|----------|----------|----------|
| MS |          | 0.000000 | 0.749526 | 0.224724 |
| S  | 0.000000 |          | 0.000000 | 0.000016 |
| N  | 0.749526 | 0.000000 |          | 0.369382 |
| O  | 0.224724 | 0.000016 | 0.369382 |          |
